# Supplementary material for: Scratching Counteracts IL-13 Signaling by Upregulating the Decoy Receptor IL-13Rα2 in Keratinocytes
Source: PubMed Central journal article supplement (PMC6651282; doi:10.3390/ijms20133324), 2019-07-06
Supplement: ijms-20-03324-s001.pdf [file ijms-20-03324-s001.pdf]

Suppl. Materials

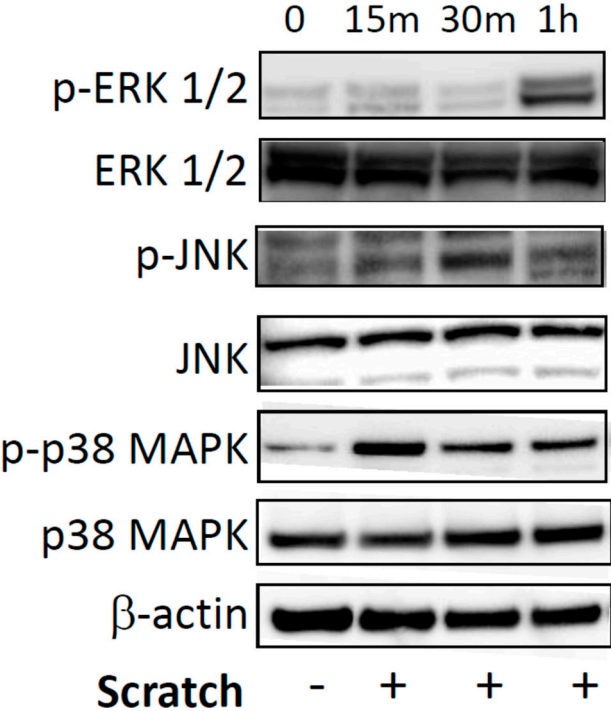

**Figure S1.** Confluent keratinocyte sheets were scratched with 18 scratch lines. Cellular proteins were obtained after 15 m, 30 m and 1 h after scratching. Phosphorylated and total amounts of ERK1/2, JNK and p38 were assessed by Western blotting. Amounts of β-actin were used for normalization.

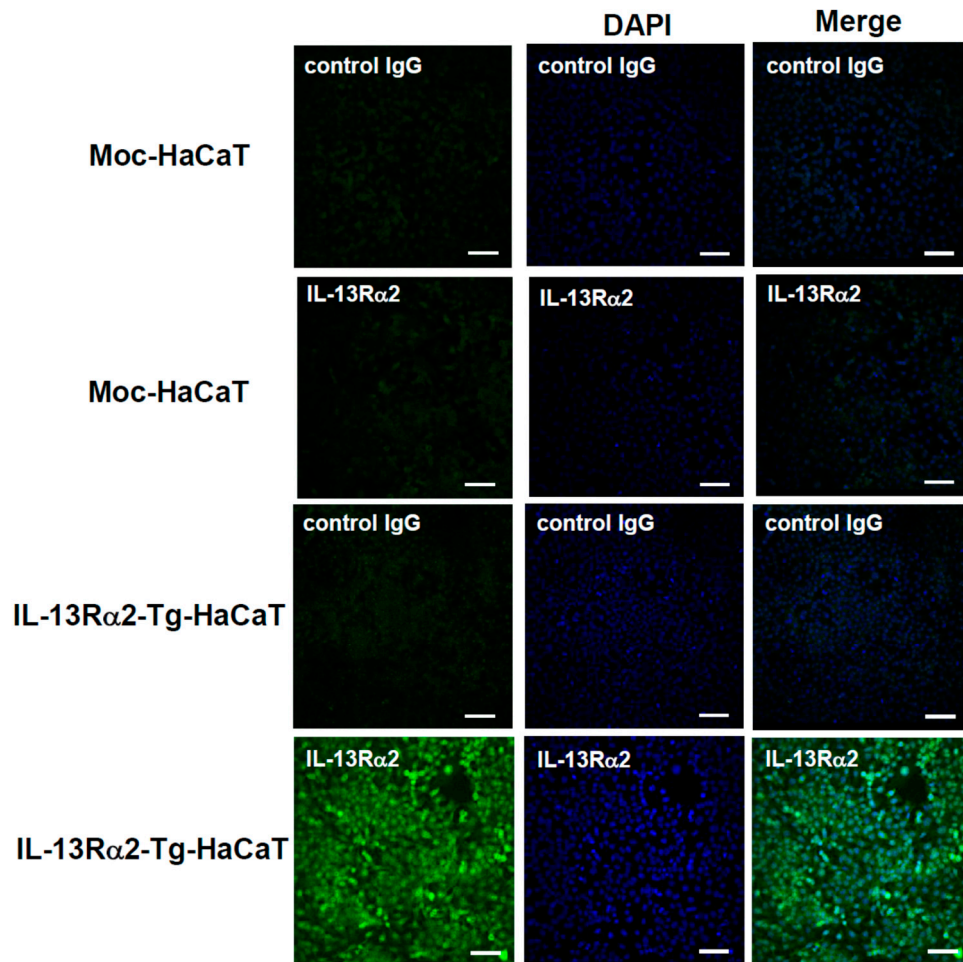

**Figure S2.** The protein expression of IL-13R $\alpha$ 2 was visualized in Moc-HaCaT and IL-13R $\alpha$ 2-Tg-HaCaT cells. Nuclei were stained with DAPI. Scale bar: 50  $\mu$ m.

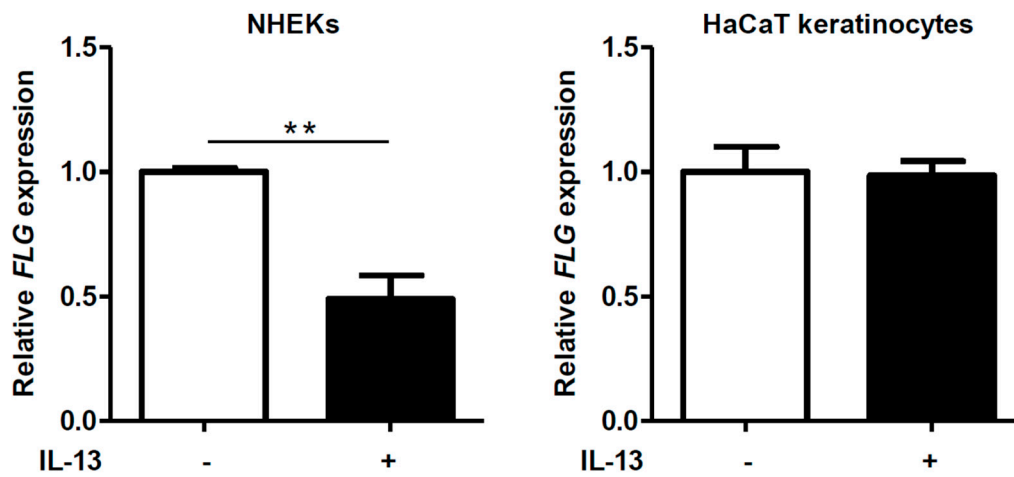

**Figure S3.** IL-13 inhibited the *FLG* expression in NHEKs but not in HaCaT keratinocytes. \*\*:  $p < 0.01$ .
